# Supplementary material for: Impact of Differentiated Service Delivery Models on Quality of Life among People living with HIV in Uganda – A Quasi-Experimental Study
Source: Research Square preprint supplement (doi:10.21203/rs.3.rs-5443965/v1), 2024-12-17
Supplement: Supplementary file 1 [file 3b509d531d2f67b95d65a248.docx]

**Additional File 1**

**Impact of Differentiated Service Delivery Models on Quality of Life among People living with HIV in Uganda**

Nasasira et.al

***Figure S1***: Description of facility and community DSD models implemented in Uganda (13)


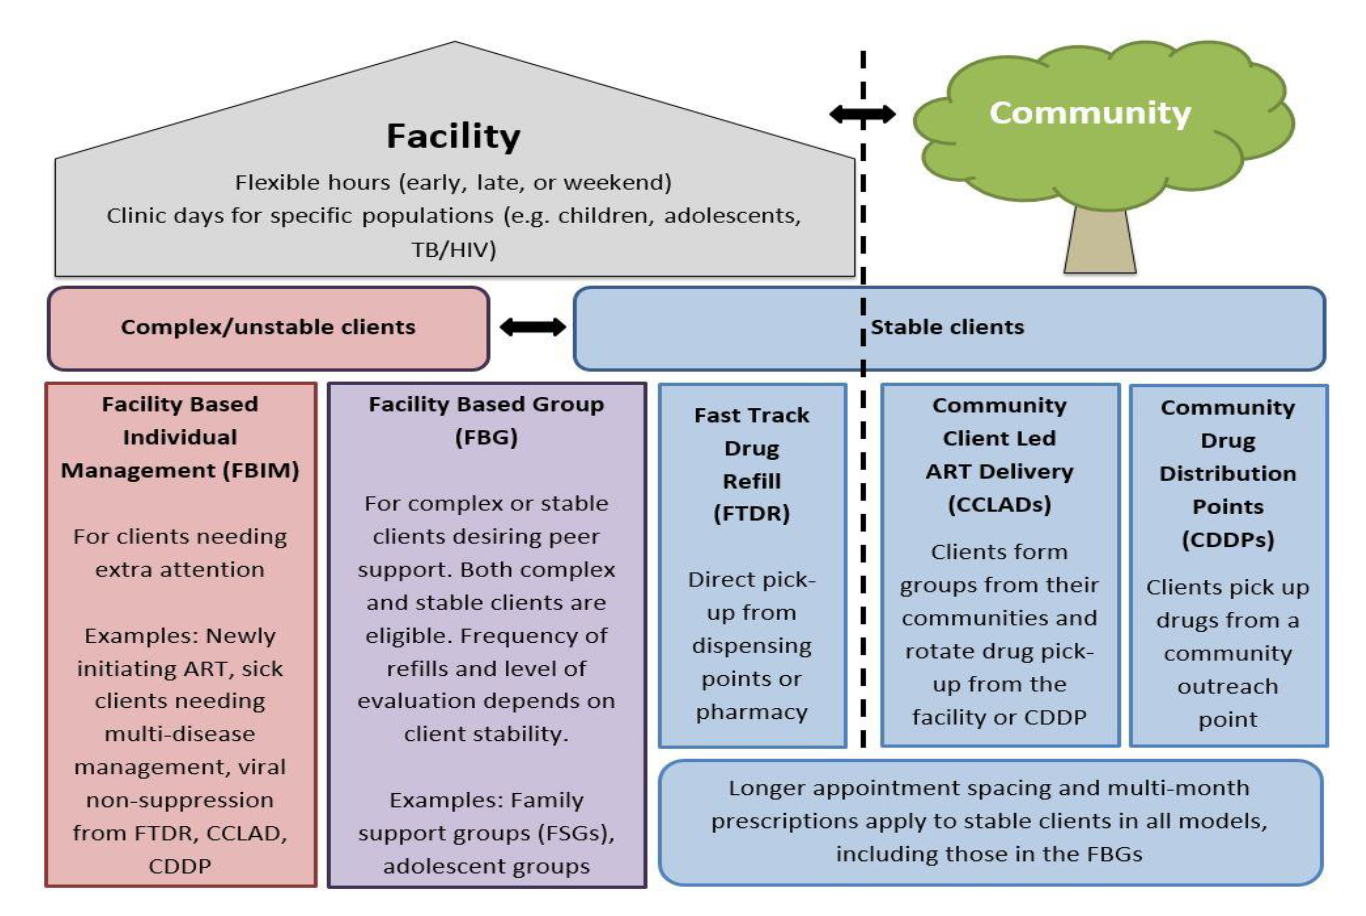


***Figure S2***: Stability criteria for DSD models (13)


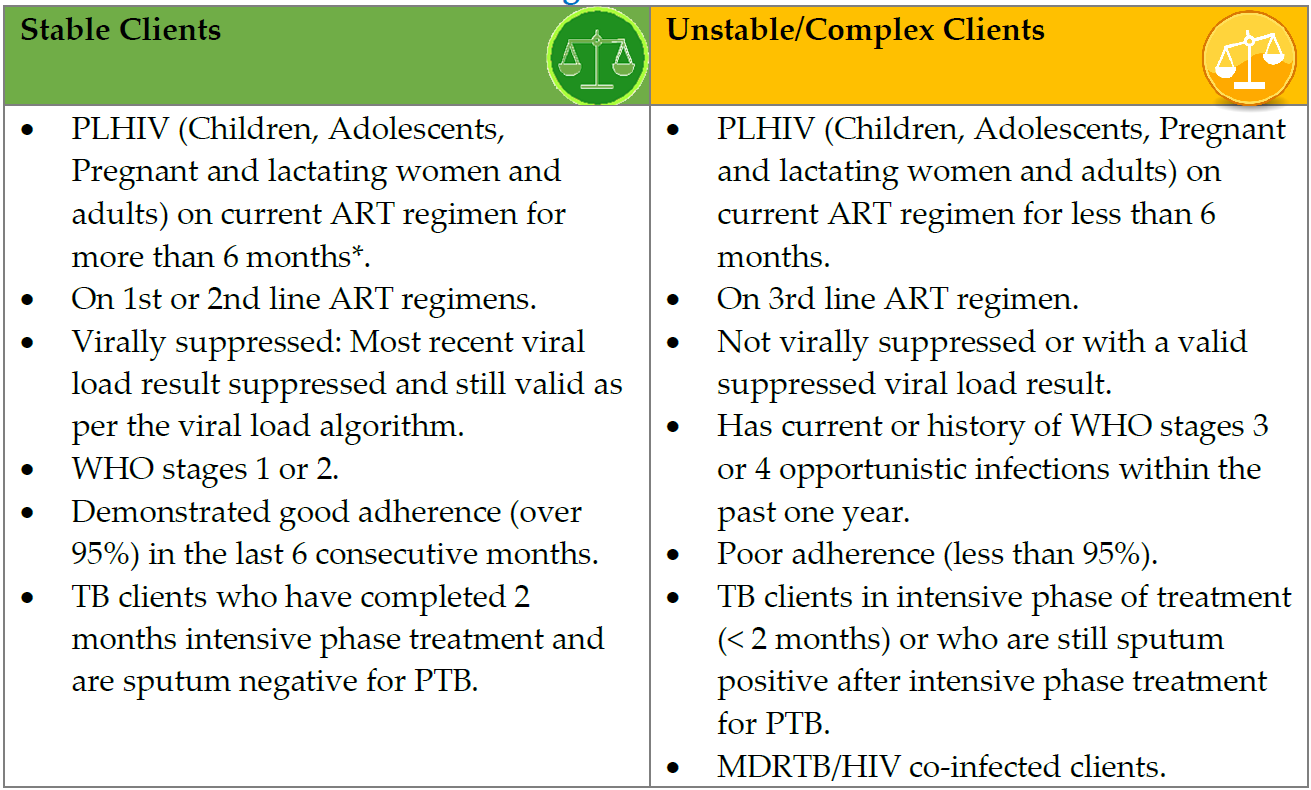


***Figure S3*:** Facility and community DSD models according to patient characterization of stability (13)


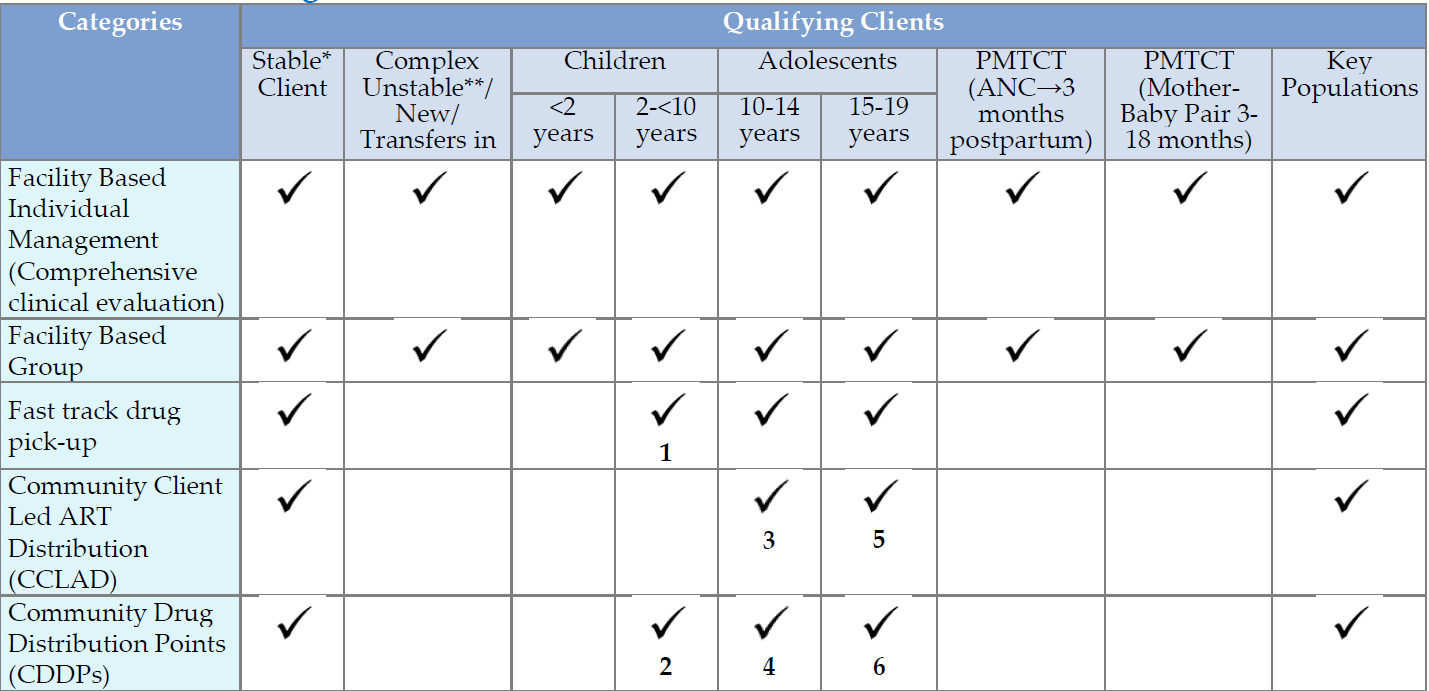


***Table S1*: Standardized differences before and after IPTW weighting showing balance in distribution of covariates between intervention (Any DSD model) and Standard of Care group (SOC)**

| **Characteristic** | **Before IPTW weighting** | | **SMD** | **After IPTW weighting** | | **SMD** |
| --- | --- | --- | --- | --- | --- | --- |
|  | **Control (SOC)** | **Intervention (DSD)** |  | **Control (SOC)** | **Intervention (DSD)** |  |
|  | **Mean (SD)** | **Mean (SD)** |  | **Mean (SD)** | **Mean (SD)** |  |
| Male gender | 0.36 (0.48) | 0.39 (0.49) | 0.07 | 0.37 (0.48) | 0.40 (0.49) | 0.06 |
| Baseline QoL score | 89.5 (7.50) | 90.3 (6.37) | 0.10 | 89.7 (7.41) | 90.3 (6.37) | 0.08 |
| Baseline age 45 to 54 years | 0.37 (0.48) | 0.43 (0.50) | 0.13 | 0.38 (0.49) | 0.43 (0.50) | 0.11 |
| Baseline age ≥55 years | 0.16 (0.36) | 0.12 (0.33) | 0.10 | 0.15 (0.36) | 0.12 (0.33) | 0.09 |
| Baseline BMI <18.5 Kgs/m2 | 0.12 (0.33) | 0.12 (0.33) | 0.01 | 0.12 (0.33) | 0.12 (0.33) | 0.08 |
| Baseline WHO stage 3 or 4 | 0.88 (0.33) | 0.87 (0.33) | 0.01 | 0.88 (0.33) | 0.87 (0.34) | 0.03 |
| Baseline VL<200 cells/m2 | 0.05 (0.23) | 0.03 (0.18) | 0.10 | 0.05 (0.23) | 0.03 (0.18) | 0.10 |
| Had partner | 0.52 (0.50) | 0.55 (0.50) | 0.07 | 0.52 (0.50) | 0.55 (0.50) | 0.07 |
| Employed | 0.81 (0.39) | 0.83 (0.38) | 0.04 | 0.84 (0.37) | 0.85 (0.35) | 0.05 |
| Household income ≥100000 UGX | 0.53 (0.50) | 0.58 (0.49) | 0.11 | 0.53 (0.50) | 0.58 (0.49) | 0.12 |
| History of tobacco use at baseline | 0.19 (0.39) | 0.21 (0.40) | 0.05 | 0.19 (0.39) | 0.21 (0.41) | 0.04 |
| Current tobacco use at baseline | 0.02 (0.15) | 0.02 (0.13) | 0.05 | 0.03 (0.16) | 0.02 (0.13) | 0.06 |
| History of alcohol use at baseline | 0.49 (0.50) | 0.48 (0.50) | 0.03 | 0.49 (0.50) | 0.47 (0.50) | 0.04 |
| Current alcohol use at baseline | 0.24 (0.43) | 0.25 (0.43) | 0.01 | 0.24 (0.43) | 0.25 (0.44) | 0.02 |
| Log transformed baseline CD4 (cells/mL) | 6.26 (0.44) | 6.28 (0.46) | 0.03 | 6.27 (0.44) | 6.27 (0.46) | 0.01 |

***Table S2*: Unweighted Mixed effect model comparing change in QoL between SOC model and any other DSD models, adjusting for participants characteristics (conventional model)**

| **Characteristic** | **exp(Beta)** | **95% CI***1* | **p-value** |
| --- | --- | --- | --- |
| factor(DSD_status2) |  |  |  |
| 0 | — | — |  |
| 1 | 2.742 | 1.621, 4.637 | 0.000 |
| Sex |  |  |  |
| Female | — | — |  |
| Male | 2.251 | 1.099, 4.612 | 0.027 |
| Baseline QoL score | 1.242 | 1.195, 1.292 | 0.000 |
| Baseline age (Yrs), categorized) |  |  |  |
| 25-44 | — | — |  |
| 45-54 | 0.359 | 0.200, 0.644 | 0.001 |
| >=55 | 0.032 | 0.014, 0.076 | 0.000 |
| Baseline BMI (Kgs/m2), categorized |  |  |  |
| <18.5 | — | — |  |
| 18.5-24.9 | 2.683 | 1.171, 6.149 | 0.020 |
| >=25 | 2.782 | 1.132, 6.835 | 0.026 |
| Baseline WHO stage |  |  |  |
| I-II | — | — |  |
| III-IV | 1.286 | 0.589, 2.808 | 0.527 |
| Baseline viral load (copies/mL) |  |  |  |
| <200 | — | — |  |
| >=200 | 0.312 | 0.086, 1.128 | 0.076 |
| Currently have partner |  |  |  |
| No | — | — |  |
| Yes | 1.351 | 0.756, 2.415 | 0.310 |
| Employed |  |  |  |
| No | — | — |  |
| Yes | 2.666 | 1.221, 5.822 | 0.014 |
| Household monthly income |  |  |  |
| < 100000 | — | — |  |
| >=100000/= | 1.284 | 0.729, 2.259 | 0.386 |
| Tobacco use |  |  |  |
| Never | — | — |  |
| Past | 0.944 | 0.454, 1.965 | 0.878 |
| Present | 0.301 | 0.050, 1.808 | 0.189 |
| Alcohol use |  |  |  |
| Never | — | — |  |
| Past | 0.875 | 0.460, 1.664 | 0.684 |
| Present | 1.336 | 0.635, 2.811 | 0.445 |
| Log transformed baseline CD4 (cells/mL) | 0.694 | 0.378, 1.274 | 0.238 |
| *1* CI = Confidence Interval | | | |

UGX denotes Uganda shillings (1 US dollar = 3,238 UGX as average exchange rate in 2015)

***Table S3*: Comparing proportions of Sustained viral suppression, mortality, and Loss to follow-up among DSD models versus standard of care.**

| Comparisons | ***Sustained viral suppression (<200)***  N=745(%) | ***Sustained viral suppression (<1000)***  *N=819(%)* | ***Mortality***  N=85(%) | ***Lost to follow-up***  N=32(%) |
| --- | --- | --- | --- | --- |
| ***Primary comparison*** |  |  |  |  |
| SOC | 374(71.9) | 421(80.9) | 72(13.9) | 29(5.6) |
| DSD | 371(80.7) | 398(86.5) | 13(2.8) | 3(0.7) |
| ***Subgroup‡*** |  |  |  |  |
| **Females** |  |  |  |  |
| SOC | 229(69.4) | 259(78.5) | 40(12.1) | 20(6.1) |
| DSD | 225(81.5) | 242(87.7) | 6(2.2) | 2(0.7) |
| **Males** |  |  |  |  |
| SOC | 145(76.3) | 162(85.3) | 32(16.8) | 9(4.7) |
| DSD | 146(79.4) | 156(84.8) | 7(3.8) | 1(0.5) |
| **Age 25 – 44 years** |  |  |  |  |
| SOC | 163(67.1) | 187(77.0) | 20(8.2) | 14(5.8) |
| DSD | 165(81.7) | 173(85.6) | 6(3.0) | 2(1.0) |
| **Age 45+ years** |  |  |  |  |
| SOC | 211(76.2) | 234(84.5) | 52(18.8) | 15(5.4) |
| DSD | 206(79.8) | 225(87.2) | 7(2.7) | 1(0.4) |
| ***TB Negative*** |  |  |  |  |
| SOC | *365(72.4)* | *410(81.4)* | *70(13.9)* | *28(5.6)* |
| DSD | *363(80.5)* | *390(86.5)* | *13(2.9)* | *2(0.4)* |
| ***TB positive*** |  |  |  |  |
| SOC | *9(56.3)* | *11(68.8)* | *2(12.5)* | *1(6.3)* |
| DSD | *8(88.9)* | *8(88.9)* | *0(0.0)* | *1(11.1)* |

SOC – denote standard of care, DSD – denotes Differentiated Service Delivery model
